# Supplementary material for: Evaluation of indicators of acute emotional states in dogs
Source: PubMed Central journal article supplement (PMC10944520; doi:10.1038/s41598-024-56859-9), 2024-03-17
Supplement: 41598_2024_56859_MOESM1_ESM.pdf [file 41598_2024_56859_MOESM1_ESM.pdf]

Supplementary Information for

## **Evaluation of indicators of acute emotional states in dogs**

Hannah E. Flint, Jennifer E. Weller, Nia Parry-Howells, Zack W. Ellerby, Stephanie L. McKay, Tammie King

### **This file contains:**

**Table S1** – Results of model pertaining to the effect of anticipated arousal and valence on parameters

**Table S2** - Results of model pertaining to the effect of anticipated arousal and the provision of food on parameters

**Table S1.** – Estimated means/estimated probability ( $\bar{x}$ ) and upper/lower 95% confidence intervals (CI) for contrasts explored within models pertaining to effect of anticipated arousal and valence on primary and secondary parameters. Matching superscript letters within a parameter indicate significant difference in means based on model contrasts ( $\alpha=0.010$ ).

| Parameter                      | Unit  | n   | Arousal | Valence               |              |              |                       |              |              |
|--------------------------------|-------|-----|---------|-----------------------|--------------|--------------|-----------------------|--------------|--------------|
|                                |       |     |         | Positive              |              |              | Negative              |              |              |
|                                |       |     |         | $\bar{x}$             | Upper 95% CI | Lower 95% CI | $\bar{x}$             | Upper 95% CI | Lower 95% CI |
| Cortisol                       | ng/ml | 204 | High    | 24.051 <sup>a</sup>   | 28.160       | 20.542       | 59.735 <sup>ac</sup>  | 70.013       | 50.965       |
|                                |       |     | Low     | 26.334 <sup>b</sup>   | 30.107       | 23.034       | 34.529 <sup>bc</sup>  | 39.409       | 30.252       |
| Heart Rate                     | bpm   | 185 | High    | 133.777 <sup>ac</sup> | 144.657      | 122.898      | 121.151 <sup>ad</sup> | 132.019      | 110.283      |
|                                |       |     | Low     | 108.452 <sup>c</sup>  | 118.998      | 97.906       | 105.643 <sup>d</sup>  | 116.194      | 95.091       |
| Heart Rate Variability (RMSSD) | ms    | 191 | High    | 132.732               | 188.415      | 93.504       | 118.359 <sup>b</sup>  | 167.631      | 83.569       |
|                                |       |     | Low     | 128.761 <sup>a</sup>  | 177.498      | 93.405       | 176.621 <sup>ab</sup> | 243.891      | 127.905      |
| PC1_Valence                    | -     | 231 | High    | 2.187 <sup>ac</sup>   | 2.529        | 1.844        | -3.573 <sup>a</sup>   | -3.230       | -3.915       |
|                                |       |     | Low     | 0.963 <sup>bc</sup>   | 1.327        | 0.598        | -3.496 <sup>b</sup>   | -3.129       | -3.863       |
| PC2_Arousal                    | -     | 231 | High    | 0.995 <sup>ac</sup>   | 1.265        | 0.725        | 0.116 <sup>a</sup>    | 0.386        | -0.153       |
|                                |       |     | Low     | -1.037 <sup>bc</sup>  | -0.679       | -1.394       | 0.002 <sup>b</sup>    | 0.361        | -0.358       |
| Serotonin                      | ng/mL | 201 | High    | 1029.377              | 1503.726     | 704.660      | 1078.104              | 1576.072     | 737.471      |
|                                |       |     | Low     | 1036.688              | 1513.019     | 710.315      | 1047.071              | 1527.485     | 717.753      |
| ACTH                           | pg/mL | 199 | High    | 16.611 <sup>a</sup>   | 25.936       | 10.637       | 31.934 <sup>ab</sup>  | 49.947       | 20.416       |
|                                |       |     | Low     | 17.979                | 27.536       | 11.738       | 19.007 <sup>b</sup>   | 29.102       | 12.412       |
| slgA                           | µg/mL | 198 | High    | 1381.987 <sup>a</sup> | 990.2717     | 1928.65      | 1499.153              | 1073.122     | 2094.319     |
|                                |       |     | Low     | 2069.414 <sup>a</sup> | 1489.077     | 2875.924     | 1908.588              | 1374.296     | 2650.597     |
| Heart Rate Variability (SDRR)  | ms    | 191 | High    | 156.107               | 201.258      | 110.956      | 136.017               | 179.549      | 90.485       |
|                                |       |     | Low     | 136.041 <sup>a</sup>  | 171.227      | 100.856      | 163.733 <sup>a</sup>  | 199.114      | 128.352      |
| Left Eye Mean Temp             | °C    | 220 | High    | 35.489 <sup>a</sup>   | 36.056       | 34.922       | 35.095 <sup>a</sup>   | 35.660       | 34.530       |
|                                |       |     | Low     | 35.315                | 35.876       | 34.753       | 35.380                | 35.945       | 34.815       |
| Right Eye Mean Temp            | °C    | 220 | High    | 35.414 <sup>a</sup>   | 35.967       | 34.861       | 35.068 <sup>a</sup>   | 35.619       | 34.517       |
|                                |       |     | Low     | 35.263                | 35.806       | 34.720       | 35.299                | 35.845       | 34.753       |
| Eye Mean Temp Difference       | °C    | 220 | High    | -0.010                | 0.115        | -0.134       | 0.032                 | 0.162        | -0.098       |
|                                |       |     | Low     | 0.010                 | 0.106        | -0.087       | -0.018                | 0.079        | -0.116       |
| Left Ear Temp                  | °C    | 224 | High    | 38.795 <sup>ab</sup>  | 39.056       | 38.535       | 38.328 <sup>a</sup>   | 38.587       | 38.069       |
|                                |       |     | Low     | 38.273 <sup>b</sup>   | 38.490       | 38.055       | 38.423                | 38.647       | 38.199       |
| Right Ear Temp                 | °C    | 222 | High    | 38.747 <sup>ab</sup>  | 39.004       | 38.489       | 38.273 <sup>a</sup>   | 38.530       | 38.016       |
|                                |       |     | Low     | 38.330 <sup>b</sup>   | 38.534       | 38.126       | 38.371                | 38.581       | 38.161       |
| Ear Temp Difference            | °C    | 222 | High    | -0.014                | 0.124        | -0.152       | -0.008                | 0.134        | -0.150       |
|                                |       |     | Low     | 0.089                 | 0.237        | -0.059       | -0.018                | 0.131        | -0.167       |
| Nose Mean Temp                 | °C    | 220 | High    | 25.544 <sup>ab</sup>  | 27.089       | 23.998       | 22.309 <sup>ac</sup>  | 23.846       | 20.771       |
|                                |       |     | Low     | 23.552 <sup>b</sup>   | 25.014       | 22.089       | 23.448 <sup>c</sup>   | 24.926       | 21.969       |

|                             |   |     |             |                     |       |        |                     |       |        |
|-----------------------------|---|-----|-------------|---------------------|-------|--------|---------------------|-------|--------|
| Mean Activity Points        | - | 217 | <i>High</i> | 3.273 <sup>ab</sup> | 3.553 | 2.993  | 0.929 <sup>a</sup>  | 1.207 | 0.652  |
|                             |   |     | <i>Low</i>  | 0.737 <sup>b</sup>  | 0.878 | 0.595  | 0.675               | 0.819 | 0.531  |
| Proportion of time Sitting  | - | 209 | <i>High</i> | 0.024 <sup>ac</sup> | 0.084 | -0.036 | 0.092 <sup>a</sup>  | 0.153 | 0.031  |
|                             |   |     | <i>Low</i>  | 0.275 <sup>bc</sup> | 0.357 | 0.193  | 0.096 <sup>b</sup>  | 0.178 | 0.013  |
| Proportion of time Standing | - | 209 | <i>High</i> | 0.939 <sup>ac</sup> | 1.013 | 0.865  | 0.600 <sup>ad</sup> | 0.675 | 0.525  |
|                             |   |     | <i>Low</i>  | 0.361 <sup>c</sup>  | 0.458 | 0.263  | 0.408 <sup>d</sup>  | 0.507 | 0.310  |
| Proportion on time Lying    | - | 209 | <i>High</i> | 0.044 <sup>ab</sup> | 0.107 | -0.019 | 0.316 <sup>ac</sup> | 0.380 | 0.252  |
|                             |   |     | <i>Low</i>  | 0.372 <sup>b</sup>  | 0.463 | 0.281  | 0.501 <sup>c</sup>  | 0.593 | 0.408  |
| Proportion of time Panting  | - | 219 | <i>High</i> | 0.042               | 0.183 | 0.004  | 0.069 <sup>a</sup>  | 0.287 | 0.011  |
|                             |   |     | <i>Low</i>  | 0.011               | 0.101 | -0.002 | 0.008 <sup>a</sup>  | 0.057 | -0.005 |
| Probability of Body Shake   | - | 231 | <i>High</i> | 0.776 <sup>a</sup>  | 0.936 | 0.450  | 0.100 <sup>ab</sup> | 0.363 | 0.021  |
|                             |   |     | <i>Low</i>  | 0.650               | 0.883 | 0.314  | 0.383 <sup>b</sup>  | 0.717 | 0.132  |
| Probability of Whining      | - | 115 | <i>High</i> | -                   | -     | -      | 0.189 <sup>a</sup>  | 0.541 | 0.044  |
|                             |   |     | <i>Low</i>  | -                   | -     | -      | 0.510 <sup>a</sup>  | 0.816 | 0.541  |

**Table S2.** – Estimated means/estimated probability ( $\bar{x}$ ) and upper/lower 95% confidence intervals (CI) for contrasts explored within models pertaining to effect of anticipated arousal and the provision of food on parameters. Matching superscript letters within a parameter indicate significant difference in means based on model contrasts ( $\alpha=0.010$ ).

| Parameter                      | Unit  | n   | Arousal | Food Provision        |              |              |                        |              |              |
|--------------------------------|-------|-----|---------|-----------------------|--------------|--------------|------------------------|--------------|--------------|
|                                |       |     |         | Food                  |              |              | No Food                |              |              |
|                                |       |     |         | $\bar{x}$             | Upper 95% CI | Lower 95% CI | $\bar{x}$              | Upper 95% CI | Lower 95% CI |
| Cortisol                       | ng/ml | 203 | High    | 23.920                | 28.017       | 20.421       | 24.000                 | 28.136       | 20.472       |
|                                |       |     | Low     | 25.412                | 29.795       | 21.673       | 26.156                 | 30.643       | 22.325       |
| Heart Rate                     | bpm   | 188 | High    | 138.548 <sup>b</sup>  | 152.534      | 124.563      | 134.326 <sup>c</sup>   | 148.363      | 120.289      |
|                                |       |     | Low     | 125.357 <sup>ab</sup> | 139.352      | 111.362      | 108.455 <sup>ac</sup>  | 122.445      | 94.465       |
| Heart Rate Variability (RMSSD) | ms    | 191 | High    | 126.039               | 215.680      | 73.652       | 128.756                | 220.790      | 75.084       |
|                                |       |     | Low     | 94.003                | 164.271      | 53.791       | 126.194                | 219.850      | 72.434       |
| PC1_Valence                    | -     | 234 | High    | 2.420 <sup>b</sup>    | 2.616        | 2.224        | 2.182 <sup>c</sup>     | 2.379        | 1.984        |
|                                |       |     | Low     | 1.705 <sup>ab</sup>   | 2.071        | 1.340        | 0.962 <sup>ac</sup>    | 1.330        | 0.593        |
| PC2_Arousal                    | -     | 234 | High    | 1.257 <sup>ac</sup>   | 1.586        | 0.927        | 0.969 <sup>ad</sup>    | 1.299        | 0.638        |
|                                |       |     | Low     | -0.556 <sup>bc</sup>  | -0.152       | -0.959       | -1.073 <sup>bd</sup>   | -0.667       | -1.478       |
| Serotonin                      | ng/mL | 202 | High    | 1062.701              | 1538.793     | 733.907      | 1024.325               | 1483.323     | 707.358      |
|                                |       |     | Low     | 1088.325              | 1574.593     | 752.226      | 1036.464               | 1499.318     | 716.497      |
| ACTH                           | pg/mL | 201 | High    | 15.293                | 26.496       | 8.825        | 16.373                 | 28.376       | 9.445        |
|                                |       |     | Low     | 15.125                | 26.420       | 8.657        | 17.809                 | 31.090       | 10.200       |
| slgA                           | µg/mL | 205 | High    | 1190.455              | 1696.790     | 835.213      | 1423.689 <sup>b</sup>  | 2032.020     | 997.475      |
|                                |       |     | Low     | 1334.390 <sup>a</sup> | 1919.092     | 927.832      | 2175.169 <sup>ab</sup> | 3137.266     | 1508.115     |
| Heart Rate Variability (SDRR)  | ms    | 191 | High    | 134.311               | 196.461      | 72.162       | 155.622                | 218.53       | 92.713       |
|                                |       |     | Low     | 129.486               | 190.952      | 68.019       | 136.027                | 197.008      | 75.046       |
| Left Eye Mean Temp             | °C    | 222 | High    | 35.584                | 36.213       | 34.956       | 35.597                 | 36.222       | 34.971       |
|                                |       |     | Low     | 35.473                | 36.103       | 34.843       | 35.416                 | 36.040       | 34.793       |
| Right Eye Mean Temp            | °C    | 222 | High    | 35.578                | 36.174       | 34.983       | 35.584                 | 36.177       | 34.991       |
|                                |       |     | Low     | 35.559                | 36.159       | 34.959       | 35.419                 | 36.014       | 34.825       |
| Eye Mean Temp Difference       | °C    | 222 | High    | -0.003                | 0.108        | -0.115       | -0.010                 | 0.100        | -0.121       |
|                                |       |     | Low     | 0.088                 | 0.193        | -0.017       | 0.004                  | 0.107        | -0.098       |
| Left Ear Temp                  | °C    | 228 | High    | 38.852 <sup>b</sup>   | 39.110       | 38.595       | 38.812 <sup>c</sup>    | 39.066       | 38.557       |
|                                |       |     | Low     | 38.591 <sup>ab</sup>  | 38.839       | 38.342       | 38.280 <sup>ac</sup>   | 38.514       | 38.045       |
| Right Ear Temp                 | °C    | 227 | High    | 38.769 <sup>a</sup>   | 39.032       | 38.507       | 38.766 <sup>b</sup>    | 39.026       | 38.507       |
|                                |       |     | Low     | 38.449 <sup>a</sup>   | 38.701       | 38.197       | 38.349 <sup>b</sup>    | 38.586       | 38.113       |
| Ear Temp Difference            | °C    | 226 | High    | -0.059                | 0.048        | -0.166       | -0.022                 | 0.087        | -0.130       |
|                                |       |     | Low     | -0.132                | 0.030        | -0.294       | 0.090                  | 0.250        | -0.069       |
| Nose Mean Temp                 | °C    | 222 | High    | 26.382 <sup>a</sup>   | 28.119       | 24.645       | 26.277 <sup>b</sup>    | 28.003       | 24.551       |
|                                |       |     | Low     | 24.323 <sup>a</sup>   | 26.059       | 22.587       | 24.200 <sup>b</sup>    | 25.909       | 22.491       |
| Mean Whistle Activity Points   | -     | 219 | High    | 3.108 <sup>b</sup>    | 3.427        | 2.789        | 3.269 <sup>c</sup>     | 3.588        | 2.950        |
|                                |       |     | Low     | 1.366 <sup>ab</sup>   | 1.499        | 1.232        | 0.737 <sup>ac</sup>    | 0.872        | 0.603        |

|                           |   |     |             |                     |       |        |                     |       |        |
|---------------------------|---|-----|-------------|---------------------|-------|--------|---------------------|-------|--------|
| Proportion of Sitting     | - | 217 | <i>High</i> | 0.009               | 0.028 | -0.011 | 0.018 <sup>b</sup>  | 0.037 | -0.001 |
|                           |   |     | <i>Low</i>  | 0.044 <sup>a</sup>  | 0.106 | -0.017 | 0.266 <sup>ab</sup> | 0.329 | 0.203  |
| Proportion of Standing    | - | 217 | <i>High</i> | 0.964 <sup>b</sup>  | 1.024 | 0.904  | 0.938 <sup>c</sup>  | 0.998 | 0.878  |
|                           |   |     | <i>Low</i>  | 0.708 <sup>ab</sup> | 0.803 | 0.613  | 0.354 <sup>ac</sup> | 0.451 | 0.257  |
| Proportion on Lying       | - | 217 | <i>High</i> | 0.028 <sup>a</sup>  | 0.072 | -0.016 | 0.044 <sup>b</sup>  | 0.088 | 0.000  |
|                           |   |     | <i>Low</i>  | 0.248 <sup>a</sup>  | 0.339 | 0.158  | 0.380 <sup>b</sup>  | 0.472 | 0.287  |
| Proportion of Panting     | - | 226 | <i>High</i> | 0.017 <sup>a</sup>  | 0.067 | -0.001 | 0.045 <sup>a</sup>  | 0.147 | 0.010  |
|                           |   |     | <i>Low</i>  | 0.012               | 0.052 | -0.002 | 0.021               | 0.080 | 0.001  |
| Probability of Body Shake | - | 234 | <i>High</i> | 0.318 <sup>ab</sup> | 0.682 | 0.092  | 0.798 <sup>a</sup>  | 0.949 | 0.456  |
|                           |   |     | <i>Low</i>  | 0.712 <sup>b</sup>  | 0.919 | 0.352  | 0.669               | 0.902 | 0.308  |
